# Supplementary material for: Oxidative stress, mitochondrial damage, and cores in muscle from calsequestrin-1 knockout mice
Source: PubMed Central journal article supplement (PMC4464246; doi:10.1186/s13395-015-0035-9), 2015-04-18
Supplement: 13395_2015_35_MOESM3_ESM.pdf [file 13395_2015_35_MOESM3_ESM.pdf]

**ADDITIONAL FILE 3**

*Table S1. Quantitative analyses of fibers containing areas of structural disarray (unstructured cores and contracture cores) reveals that alterations are far more frequent in CASQ1-null fibers.*

| <b>EDL</b><br><b>(n=2)</b> | <b>Age</b><br><b>(months)</b> | <b>Total No. of</b><br><b>analyzed</b><br><b>fibers (No. of</b><br><b>mice)</b> | <b>No. of fiber with alterations</b>            |                                                | <b>C</b><br><b>% Total fiber</b><br><b>area altered</b> |
|----------------------------|-------------------------------|---------------------------------------------------------------------------------|-------------------------------------------------|------------------------------------------------|---------------------------------------------------------|
|                            |                               |                                                                                 | <b>A</b><br><b>Unstructured</b><br><b>Cores</b> | <b>B</b><br><b>Contracture</b><br><b>Cores</b> |                                                         |
| <b>WT</b>                  | 4                             | 34 (2)                                                                          | 0 (0%)                                          | 0 (0%)                                         | <b>0</b>                                                |
| <b>WT</b>                  | 14                            | 58 (2)                                                                          | 2 (3%)                                          | 0 (0%)                                         | <b>3</b>                                                |
| <b>WT</b>                  | 20                            | 56 (2)                                                                          | 0 (0%)                                          | 1 (2%)                                         | <b>2</b>                                                |
| <b>WT</b>                  | 24                            | 65 (2)                                                                          | 1 (2%)                                          | 2 (3%)                                         | <b>5</b>                                                |
| <b>WT</b>                  | 27                            | 63 (2)                                                                          | 4 (6%)                                          | 1 (2%)                                         | <b>8</b>                                                |
| <b>CASQ1-null</b>          | 4                             | 41 (2)                                                                          | 1 (2%)                                          | 0 (0%)                                         | <b>2<sup>&amp;</sup></b>                                |
| <b>CASQ1-null</b>          | 14                            | 62 (2)                                                                          | 10 (17%)                                        | 4 (6%)                                         | <b>23**</b>                                             |
| <b>CASQ1-null</b>          | 20                            | 83 (2)                                                                          | 13 (16%)                                        | 5 (6%)                                         | <b>22**</b>                                             |
| <b>CASQ1-null</b>          | 24                            | 85 (2)                                                                          | 14 (16%)                                        | 7 (8%)                                         | <b>24**</b>                                             |
| <b>CASQ1-null</b>          | 27                            | 81 (2)                                                                          | 9 (11%)                                         | 10 (13%)                                       | <b>24*</b>                                              |

Columns A and B) Fibers exhibiting unstructured and contracture cores are frequent in EDL muscles of CASQ1-null mice starting at 14 months, but rare in EDL muscles of age-matched WT mice. There it seems to be trend for an increased percentage of contracture cores (from 6 to 13% between 14 and 27 months of age), which suggests that probably unstructured cores may be an early-point in formation of contracture cores. Column C) The total percentage of fiber area exhibiting ultrastructural decay (unstructured cores + contraction cores) increases significantly from 4 to 14 months of age in CASQ1-null muscles, but remains unchanged at later stages. \*p < 0.05 and \*\*p < 0.01 compared to age matched WT; &p < 0.05 compared to 14-month-old CASQ1-null.
