# Supplementary material for: Oxidative stress, mitochondrial damage, and cores in muscle from calsequestrin-1 knockout mice
Source: PubMed Central journal article supplement (PMC4464246; doi:10.1186/s13395-015-0035-9), 2015-04-18
Supplement: 13395_2015_35_MOESM6_ESM.pdf [file 13395_2015_35_MOESM6_ESM.pdf]

**ADDITIONAL FILE 6**

*Figure S3.*

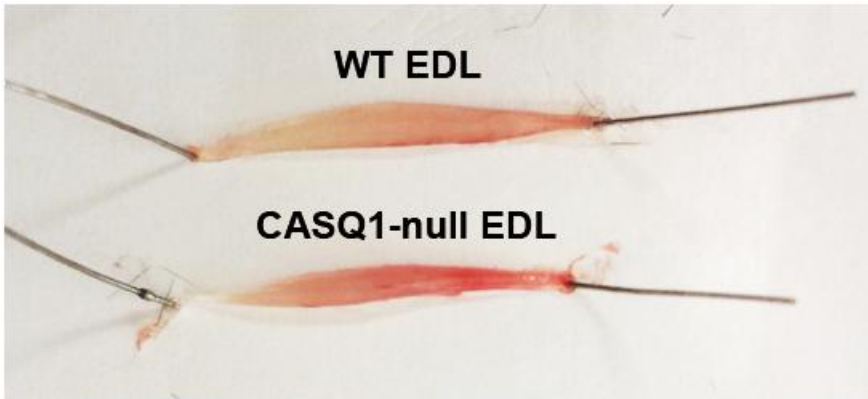

*Figure S3. Dissected EDL muscles of CASQ1-null mice are more red-colored than those from WT mice.* Representative EDL muscles from 4 months old WT (upper) and CASQ1-null (lower) mice reveals that EDL muscle from CASQ1-null mice are more red-colored, consistent with increased capillarization and myoglobin/heme content.
